# Supplementary material for: Bartonella henselae Recombinant Pap31 for the Diagnosis of Canine and Human Bartonelloses
Source: MDPI journal article supplement (doi:10.3390/pathogens11020182), 2022-01-28
Supplement: s1 [file s1]

### Supplementary materials

**Supplementary Table S1.** *Bartonella* and canine vector-borne disease (CVBD) testing results for dogs and humans clinical samples used for comparative ELISA testing in this study. POS= positive; NEG= negative; NT= not tested; n/a = not available; *Bh* = *B. henselae* ; *Bvb* TI= *B. vinsonii* subsp. *berkhoffii* (*Bvb* ) genotype I; *Bvb* TII= *Bvb* genotype II; *Bvb* TIII= *Bvb* genotype III; *Rr* = *Rickettsia rickettsii*; *Bart* . = *Bartonella* spp., ddPCR= droplet digital PCR; IFA= Immunofluorescent antibody assay; CVBD PCR = PCR testing for *Babesia* , *Ehrlichia* , *Anaplasma* , *Rickettsia* , hemotropic *Mycoplasma* and *Leishmania* spp.; CVBD serology = IFA testing for *Rickettsia rickettsii*, *Ehrlichia canis*, *Babesia canis*, and *Babesia gibsoni* plus ELISA testing (SNAP 4Dx PLUS ELISA, IDEXX Laboratories, Westbrook, Maine) for *Anaplasma phagocytophilum*, *Anaplasma platys*, *Borrelia burgdorferi*, *Ehrlichia canis*, and *Ehrlichia ewingii*. Detailed methods for the *Bartonella* PCR, BAPGM (*Bartonella* Alpha Proteobacteria Growth Medium) enrichment blood culture, and the IFA serological panel used to test these study participants have been published previously [14,21]. *Bartonella* blood droplet digital PCR (ddPCR) was performed as described previously [43]. Of the four dogs positive for CVBD by serology, one dog was seropositive to *Babesia canis* (IFA titer 1:1024) and *Babesia gibsoni* (IFA titer 1:4096), one dog was seropositive to *Ehrlichia canis* (IFA titer 1:2048), one dog was seropositive to *Babesia canis* (IFA titer 1:2048) and *Babesia gibsoni* (IFA titer 1:2048), and the remaining dog was seropositive to *Babesia canis* (IFA titer 1:64). Two (2\*) of these four dogs were also *R. rickettsii* IFA positive.

| Testing             | Testing Results | Testing Results for Dogs and Humans Groups       |                               |                                                      |                                 |
|---------------------|-----------------|--------------------------------------------------|-------------------------------|------------------------------------------------------|---------------------------------|
|                     |                 | Group I ( <i>Bartonella</i> infected dogs; n=36) | Group II (control dogs; n=34) | Group III ( <i>Bartonella</i> infected humans; n=18) | Group IV (control humans; n=18) |
| <i>Bh</i> IFA       | POS             | 36                                               | 0                             | 15                                                   | 0                               |
|                     | NEG             | 0                                                | 34                            | 3                                                    | 18                              |
| <i>Bvb</i> TI IFA   | POS             | 23                                               | 0                             | 8                                                    | 0                               |
|                     | NEG             | 13                                               | 34                            | 10                                                   | 18                              |
| <i>Bvb</i> TII IFA  | POS             | n/a                                              | n/a                           | 10                                                   | 0                               |
|                     | NEG             | n/a                                              | n/a                           | 8                                                    | 18                              |
| <i>Bvb</i> TIII IFA | POS             | n/a                                              | n/a                           | 14                                                   | 0                               |
|                     | NEG             | n/a                                              | n/a                           | 4                                                    | 18                              |
| <i>Bk</i> IFA       | POS             | 32                                               | 0                             | 11                                                   | 0                               |
|                     | NEG             | 4                                                | 34                            | 7                                                    | 18                              |
| <i>Bart.</i> PCR    | POS             | 3                                                | 0                             | 6                                                    | 0                               |
|                     | NEG             | 33                                               | 34                            | 12                                                   | 18                              |
| <i>Bart.</i> ddPCR  | POS             | n/a                                              | n/a                           | 12                                                   | n/a                             |
|                     | NEG             | n/a                                              | n/a                           | 1                                                    | n/a                             |
|                     | NT              | n/a                                              | n/a                           | 5                                                    | n/a                             |
| BAPGM               | POS             | 0                                                | 0                             | 9                                                    | 0                               |
|                     | NEG             | 8                                                | 21                            | 9                                                    | 18                              |
|                     | NT              | 28                                               | 13                            | 0                                                    | 0                               |
| <i>Rr</i> IFA       | POS             | 2*                                               | 10                            | n/a                                                  | n/a                             |
|                     | NEG             | 24                                               | 6                             | n/a                                                  | n/a                             |
|                     | NT              | 10                                               | 18                            | n/a                                                  | n/a                             |
| CVBD PCR            | POS             | 0                                                | 0                             | n/a                                                  | n/a                             |
|                     | NEG             | 24                                               | 16                            | n/a                                                  | n/a                             |
|                     | NT              | 12                                               | 18                            | n/a                                                  | n/a                             |
| CVBD Serology       | POS             | 4                                                | 0                             | n/a                                                  | n/a                             |
|                     | NEG             | 24                                               | 16                            | n/a                                                  | n/a                             |
|                     | NT              | 8                                                | 18                            | n/a                                                  | n/a                             |

**Supplementary Table S2.** The full list of linear B-cell epitopes of *Bartonella henselae* Pap31. Six algorithms (AAP, ABCPred, BCPred, BepiPred 2.0, FBCPred, and SVMTriP) were employed to predict linear B-cell epitopes of *B. henselae* Pap31. The antigenicity of predicted linear B-cell epitopes was determined by Vaxijen 2.0.

| Start | End | Peptide                                               | Peptide Length | Methods     | Antigenicity | Hydrophobicity | Hydropathicity | Hydrophilicity | Charge   | pl       | Mol Wt. (Da) | Topology |
|-------|-----|-------------------------------------------------------|----------------|-------------|--------------|----------------|----------------|----------------|----------|----------|--------------|----------|
| 219   | 238 | DKTKTLVGFTLGGGVDFAMT                                  | 20             | AAP         | 0.5939       | 0.01           | 0.31           | -0.15          | 0        | 6.31     | 2058.68      | outside  |
| 141   | 160 | FAQGKTSDNVAADVDKHTDSL                                 | 20             | AAP         | 0.7412       | -0.19          | -0.57          | 0.3            | -0.5     | 5.31     | 2104.54      | outside  |
| 62    | 81  | TDPNKKDKLFSKDDTPKPSG                                  | 20             | AAP         | 0.1313       | -0.44          | -1.93          | 1.14           | 1        | 8.71     | 2218.72      | outside  |
| 250   | 269 | SDFGKKKFEKEGSEFSYKTN                                  | 20             | AAP         | 0.8734       | -0.38          | -1.69          | 0.9            | 1        | 8.66     | 2356.85      | outside  |
| 102   | 121 | VETDAVWADREDAKTSSAEA                                  | 20             | AAP         | 1.1311       | -0.25          | -0.79          | 0.74           | -4       | 4.02     | 2151.48      | outside  |
| 32    | 51  | APTVISAPAFSWTGFYIGGQ                                  | 20             | AAP         | 0.4094       | 0.16           | 0.55           | -0.86          | 0        | 5.88     | 2070.62      | outside  |
| 83    | 98  | MGGIYAGSNMDLGNM                                       | 16             | ABCPred     | 0.2473       | 0              | -0.12          | -0.4           | -1       | 3.8      | 1645.1       | outside  |
| 58    | 73  | KVEITDPNKKDKLFSK                                      | 16             | ABCPred     | 0.2149       | -0.39          | -1.33          | 1.03           | 2        | 9.43     | 1890.44      | outside  |
| 209   | 224 | DAEIAQAQLFDKTKTL                                      | 16             | ABCPred     | -0.2359      | -0.15          | -0.22          | 0.29           | -1       | 4.56     | 1765.22      | outside  |
| 255   | 270 | KKFEKEGSEFSYKTN                                       | 16             | ABCPred     | 1.0881       | -0.43          | -1.97          | 1.07           | 0        | 6.59     | 1937.31      | outside  |
| 243   | 258 | LRAEYRYSDFGKKKFE                                      | 16             | ABCPred     | 0.6593       | -0.43          | -1.49          | 0.78           | 2        | 9.43     | 2037.52      | outside  |
| 100   | 115 | LGVEDAVWADREDAK                                       | 16             | ABCPred     | 0.802        | -0.22          | -0.64          | 0.68           | -3       | 4.11     | 1775.12      | outside  |
| 140   | 155 | AFAQGKTSDNVAADV                                       | 16             | ABCPred     | 0.558        | -0.16          | -0.33          | 0.3            | 0        | 6.31     | 1621.98      | outside  |
| 119   | 134 | AEAIGQDELETFRDSL                                      | 16             | ABCPred     | 0.147        | -0.2           | -0.56          | 0.57           | -4       | 3.84     | 1794.13      | outside  |
| 179   | 194 | ADRIPIYVAGGVSYAQ                                      | 16             | ABCPred     | 0.2178       | -0.02          | 0.18           | -0.36          | 0        | 6.18     | 1698.15      | outside  |
| 32    | 47  | APTVISAPAFSWTGFY                                      | 16             | ABCPred     | 0.379        | 0.17           | 0.68           | -0.98          | 0        | 5.88     | 1715.15      | outside  |
| 187   | 202 | AGGVSYAQVQAVSSTK                                      | 16             | ABCPred     | 0.8694       | -0.05          | 0.12           | -0.28          | 1        | 8.94     | 1552.93      | outside  |
| 163   | 178 | KEKWSGATRVIGFTA                                       | 16             | ABCPred     | 0.7092       | -0.24          | -0.57          | 0.27           | 3        | 11.01    | 1807.31      | outside  |
| 262   | 277 | SEFSYKTNDFRVGVAY                                      | 16             | ABCPred     | 1.2438       | -0.17          | -0.52          | -0.04          | 0        | 6.41     | 1883.26      | outside  |
| 226   | 241 | GFTLGGGVDFAMTDNV                                      | 16             | ABCPred     | 1.1084       | 0.1            | 0.5            | -0.39          | -2       | 3.57     | 1601         | outside  |
| 40    | 55  | AFSWTGFYIGGQVGNF                                      | 16             | ABCPred     | -0.0756      | 0.16           | 0.41           | -1.04          | 0        | 5.88     | 1751.17      | outside  |
| 202   | 217 | KVTQAADDAEIAQAQL                                      | 16             | ABCPred     | 0.746        | -0.12          | -0.08          | 0.25           | -2       | 4.03     | 1645.02      | outside  |
| 17    | 32  | ASAAQAADVIVPHEVA                                      | 16             | ABCPred     | 0.6289       | 0.07           | 0.74           | -0.21          | -1.5     | 4.36     | 1548.93      | outside  |
| 89    | 104 | GSNMDLGNMILGVET                                       | 16             | ABCPred     | 0.7611       | -0.02          | -0.01          | -0.19          | -2       | 3.67     | 1665.12      | outside  |
| 70    | 85  | LFSKDDTPKPSGFMGG                                      | 16             | ABCPred     | -0.3994      | -0.12          | -0.64          | 0.26           | 0        | 6.31     | 1684.12      | outside  |
| 9     | 24  | TSVIALISASAAQAAD                                      | 16             | ABCPred     | 0.3597       | 0.1            | 1.11           | -0.39          | -1       | 3.8      | 1488.87      | outside  |
| 132   | 147 | DSLKKANAFAAQGKTS                                      | 16             | ABCPred     | 0.4619       | -0.23          | -0.69          | 0.39           | 2        | 9.72     | 1637.04      | outside  |
| 150   | 165 | VAAVDKHTDSLALKEK                                      | 16             | ABCPred     | 0.8036       | -0.21          | -0.34          | 0.58           | 0.5      | 7.1      | 1725.2       | outside  |
| 126   | 141 | ELETFRDSLKKANAFA                                      | 16             | ABCPred     | 0.2521       | -0.25          | -0.57          | 0.5            | 0        | 6.53     | 1840.28      | outside  |
| 171   | 186 | RVRIQFTAADRIPIYV                                      | 16             | ABCPred     | 0.5082       | -0.13          | 0.29           | -0.13          | 2        | 10.75    | 1865.45      | outside  |
| 48    | 63  | IGGQVGNFSSKVEITD                                      | 16             | ABCPred     | 0.6677       | -0.05          | -0.08          | 0.03           | -1       | 4.38     | 1651.05      | outside  |
| 244   | 263 | RAEYRYSDFGKKKFEKGE                                    | 20             | BCPred      | 0.9622       | -0.49          | -1.98          | 1.18           | 1        | 8.66     | 2454.95      | outside  |
| 74    | 93  | DDTPKPSGFMGGIYAGSNMD                                  | 20             | BCPred      | -0.0066      | -0.1           | -0.67          | 0.14           | -2       | 3.94     | 2060.52      | outside  |
| 24    | 43  | DVIVPHEVAPTIVISAPAFSW                                 | 20             | BCPred      | 0.8199       | 0.14           | 0.79           | -0.56          | -1.5     | 4.36     | 2135.73      | outside  |
| 49    | 68  | GGQVGNFSSKVEITDPNKKD                                  | 20             | BCPred      | 0.7957       | -0.26          | -1.1           | 0.57           | 0        | 6.46     | 2120.6       | outside  |
| 107   | 126 | VWADREDAKTSSAIAIGQDE                                  | 20             | BCPred      | 1.0702       | -0.27          | -1.03          | 0.78           | -4       | 4.02     | 2178.52      | outside  |
| 24    | 43  | DVIVPHEVAPTIVISAPAFSW                                 | 20             | BepiPred2.0 | 0.8199       | 0.14           | 0.79           | -0.56          | -1.5     | 4.36     | 2135.73      | outside  |
| 55    | 81  | FSSKVEITDPNKKDKLFSKDDTPKPSG                           | 27             | BepiPred2.0 | 0.2101       | -0.34          | -1.34          | 0.87           | 1        | 8.66     | 3009.74      | outside  |
| 107   | 164 | VWADREDAKTSSAIAIGQDELETFRDSL<br>KKANAFAAQGKTS<br>ALKE | 58             | BepiPred2.0 | 0.742        | too long       | too long       | too long       | too long | too long | too long     | outside  |
| 198   | 222 | VSSTKVTAQADDAEIAQAQLFDKTK                             | 25             | BepiPred2.0 | 0.4086       | -0.18          | -0.34          | 0.35           | -1       | 4.69     | 2639.26      | outside  |
| 247   | 269 | YRYSDFGKKKFEKEGSEFSYKTN                               | 23             | BepiPred2.0 | 0.806        | -0.4           | -1.78          | 0.71           | 2        | 9.2      | 2839.43      | outside  |
| 76    | 89  | TPKPSGFMGGIYAG                                        | 14             | FBCPred     | -0.1657      | 0.06           | -0.04          | -0.39          | 1        | 8.94     | 1382.8       | outside  |
| 108   | 121 | WADREDAKTSSAEA                                        | 14             | FBCPred     | 1.5116       | -0.35          | -1.31          | 0.91           | -2       | 4.32     | 1536.74      | outside  |
| 253   | 266 | GKKKFEKEGSEFSY                                        | 14             | FBCPred     | 0.8555       | -0.37          | -1.73          | 1.02           | 1        | 8.71     | 1664.04      | outside  |
| 57    | 70  | SKVEITDPNKKDKL                                        | 14             | FBCPred     | 0.45         | -0.41          | -1.44          | 1.14           | 1        | 8.76     | 1615.06      | outside  |
| 24    | 37  | DVIVPHEVAPTIVIS                                       | 14             | FBCPred     | 0.534        | 0.11           | 0.91           | -0.34          | -1.5     | 4.36     | 1475.91      | outside  |
| 146   | 159 | TSDNVAADVDKHTDS                                       | 14             | FBCPred     | 1.0056       | -0.26          | -0.86          | 0.54           | -1.5     | 4.42     | 1459.67      | outside  |
| 182   | 195 | IMPVYAGGVSYAQV                                        | 14             | FBCPred     | 0.5691       | 0.18           | 0.95           | -0.91          | 0        | 5.87     | 1454.91      | outside  |
| 206   | 225 | AADDAEIAQAQLFDKTKTLV                                  | 20             | SVMTriP     | -0.2272      | -0.1           | 0.04           | 0.26           | -2       | 4.23     | 2121.65      | outside  |
| 10    | 29  | SVIALISASAAQAADVIVPH                                  | 20             | SVMTriP     | 0.4093       | 0.16           | 1.32           | -0.56          | -0.5     | 5.09     | 1933.52      | outside  |
| 232   | 251 | GVDFAMTDNVLLRAEYRYS                                   | 20             | SVMTriP     | 0.9109       | -0.18          | -0.33          | 0.11           | -2       | 4.23     | 2335.85      | outside  |
| 137   | 156 | ANAAFAAQGKTSDNVAADV                                   | 20             | SVMTriP     | 0.6529       | -0.15          | -0.42          | 0.17           | 0.5      | 7.09     | 2015.44      | outside  |
| 96    | 115 | NNMILGVETDAVWADREDAK                                  | 20             | SVMTriP     | 0.4777       | -0.19          | -0.55          | 0.41           | -3       | 4.11     | 2247.75      | outside  |
